# Supplementary material for: Two novel inorganic–organic hybrid materials constructed from two kinds of octamolybdate clusters and flexible tetradentate ligands
Source: Royal Society of Chemistry journal article supplement (doi:10.1039/c1dt10893j), 2011-01-01
Supplement: c1dt10893j.pdf [file c1dt10893j.pdf]

## Electronic supplementary information (ESI)

### Two novel inorganic-organic hybrid materials constructed from two kinds of octamolybdate clusters and flexible tetradentate ligands

Hai-Yan Liu,<sup>a,b</sup> Liu Bo,<sup>a</sup> Jin Yang,<sup>\*a</sup> Ying-Ying Liu,<sup>a</sup> Jian-Fang Ma,<sup>\*a</sup> and Hua Wu<sup>a</sup>

<sup>a</sup>Key Lab of Polyoxometalate Science, Department of Chemistry, Northeast Normal University, Changchun 130024, People's Republic of China

<sup>b</sup>Department of Chemistry and Pharmaceutical Engineering, Suihua University, Suihua 152061, People's Republic of China

\* Correspondence authors

E-mail: yangjinnenu@yahoo.com.cn (J. Yang)

E-mail: jianfangma@yahoo.com.cn (J.-F. Ma)

Fax: +86-431-85098620 (J.-F. Ma)

**Table S1.** Selected Bond Lengths [Å] and Angles [°] for **1** and **2**.

| Compound 1            |           |                     |           |
|-----------------------|-----------|---------------------|-----------|
| Ag(1)-N(1)            | 2.242(14) | Ag(1)-O(17)         | 2.258(10) |
| Ag(1)-N(18)           | 2.290(14) | Ag(1)-O(4W)         | 2.769(10) |
| Ag(2)-O(1)#1          | 2.206(10) | Ag(2)-N(4)          | 2.217(14) |
| Ag(2)-N(19)           | 2.298(15) | Ag(3)-N(24)#2       | 2.134(16) |
| Ag(3)-N(3)            | 2.138(16) | Ag(3)-O(23)#1       | 2.697(16) |
| Ag(4)-N(13)           | 2.279(13) | Ag(4)-N(7)          | 2.283(14) |
| Ag(4)-O(2W)           | 2.340(13) | Ag(4)-O(50)#5       | 2.769(13) |
| Ag(5)-N(21)#3         | 2.115(17) | Ag(5)-N(9)          | 2.116(16) |
| Ag(5)-O(48)           | 2.741(16) | Ag(6)-O(1W)         | 2.182(15) |
| Ag(6)-N(11)           | 2.258(15) | Ag(6)-N(23)#4       | 2.305(16) |
| Ag(6)-O(34)#2         | 2.731(15) | Ag(7)-N(15)#2       | 2.150(17) |
| Ag(7)-N(12)           | 2.162(18) | Ag(7)-O(52)#5       | 2.635(17) |
| Ag(8)-N(17)           | 2.154(16) | Ag(8)-N(6)#2        | 2.160(15) |
| Ag(8)-O(15)           | 2.619(16) |                     |           |
| N(1)-Ag(1)-O(17)      | 119.8(5)  | N(1)-Ag(1)-O(17)    | 119.8(5)  |
| O(17)-Ag(1)-N(18)     | 128.4(4)  | N(18)-Ag(1)-O(4W)   | 85.2(5)   |
| O(17)-Ag(1)-O(4W)     | 75.8(4)   | N(1)-Ag(1)-O(4W)    | 151.73(5) |
| O(1)#1-Ag(2)-N(4)     | 134.7(5)  | O(1)#1-Ag(2)-N(19)  | 117.8(5)  |
| N(4)-Ag(2)-N(19)      | 101.5(5)  | N(24)#2-Ag(3)-N(3)  | 174.1(7)  |
| N(24)-Ag(3)-O(23)#1   | 100.28(7) | N(3)-Ag(3)-O(23)#1  | 85.62(7)  |
| N(13)-Ag(4)-N(7)      | 102.6(5)  | N(13)-Ag(4)-O(2W)   | 141.5(5)  |
| N(7)-Ag(4)-O(2W)      | 94.3(5)   | N(7)-Ag(4)-O(50)#5  | 111.93(5) |
| O(2W)-Ag(4)-O(50)#5   | 87.28(5)  | N(13)-Ag(4)-O(50)#5 | 116.85(5) |
| N(21)#3-Ag(5)-N(9)    | 168.3(7)  | N(9)-Ag(5)-O(48)    | 92.82(7)  |
| N(21)#3-Ag(5)-O(48)   | 98.6(7)   | O(1W)-Ag(6)-N(11)   | 125.9(6)  |
| O(1W)-Ag(6)-N(23)#4   | 109.2(6)  | N(11)-Ag(6)-N(23)#4 | 105.7(6)  |
| N(23)#4-Ag(6)-O(34)#2 | 112.67(6) | N(11)-Ag(6)-O(34)#2 | 119.51(6) |
| O(1W)-Ag(6)-O(34)#2   | 82.48(6)  | N(15)#2-Ag(7)-N(12) | 167.8(7)  |
| N(15)#2-Ag(7)-O(52)#5 | 90.48(6)  | N(12)-Ag(7)-O(52)#5 | 101.0(7)  |
| N(17)-Ag(8)-N(6)#2    | 169.4(7)  | N(17)-Ag(8)-O(15)   | 89.73(7)  |
| N(6)#2-Ag(8)-O(15)    | 99.24(7)  |                     |           |
| Compound 2            |           |                     |           |
| Cu(1)-N(13)           | 1.858(6)  | Cu(1)-N(11)         | 1.862(6)  |
| Cu(1)-O(16)#4         | 2.603(6)  | Cu(2)-N(2)          | 1.992(6)  |
| Cu(2)-N(8)            | 2.014(6)  | Cu(2)-N(12)         | 2.068(7)  |
| Cu(2)-O(22)           | 2.178(5)  | Cu(3)-N(1)          | 1.990(6)  |
| Cu(3)-N(1)#1          | 1.990(6)  | Cu(3)-O(9)          | 2.006(5)  |
| Cu(3)-O(9)#1          | 2.006(5)  | Cu(3)-O(6)          | 2.577(5)  |
| Cu(3)-O(6)#1          | 2.577(5)  | Cu(4)-N(9)#2        | 1.909(6)  |
| Cu(4)-N(5)            | 1.909(7)  | Cu(4)-O(13)#3       | 2.262(5)  |
| Cu(4)-O(4)#2          | 2.273(5)  | Cu(5)-N(6)          | 1.928(10) |

|                     |           |                      |           |
|---------------------|-----------|----------------------|-----------|
| Cu(5)-N(6)#3        | 1.928(10) |                      |           |
| N(13)-Cu(1)-N(11)   | 164.6(3)  | N(13)-Cu(1)-O(16)#4  | 103.99(3) |
| N(11)-Cu(1)-O(16)#4 | 90.98(3)  | N(2)-Cu(2)-N(8)      | 128.7(3)  |
| N(2)-Cu(2)-N(12)    | 119.2(3)  | N(8)-Cu(2)-N(12)     | 111.6(3)  |
| N(2)-Cu(2)-O(22)    | 89.7(2)   | N(8)-Cu(2)-O(22)     | 92.7(2)   |
| N(12)-Cu(2)-O(22)   | 95.4(2)   | N(1)-Cu(3)-N(1)#1    | 180       |
| N(1)-Cu(3)-O(9)     | 88.6(2)   | N(1)#1-Cu(3)-O(9)    | 91.4(2)   |
| N(1)-Cu(3)-O(9)#1   | 91.4(2)   | N(1)#1-Cu(3)-O(9)#1  | 88.6(2)   |
| O(9)-Cu(3)-O(9)#1   | 180       | N(1)-Cu(3)-O(6)      | 94.87(2)  |
| N(1)-Cu(3)-O(6)#1   | 85.14(2)  | O(6)-Cu(3)-O(6)#1    | 180       |
| N(9)#2-Cu(4)-N(5)   | 152.5(3)  | N(9)#2-Cu(4)-O(13)#3 | 94.8(2)   |
| N(5)-Cu(4)-O(13)#3  | 106.1(2)  | N(9)#2-Cu(4)-O(4)#2  | 99.6(2)   |
| N(5)-Cu(4)-O(4)#2   | 99.5(3)   | O(13)#3-Cu(4)-O(4)#2 | 86.09(18) |
| N(6)-Cu(5)-N(6)#3   | 180       |                      |           |

Symmetry codes For **1**: #1 -x+1,y+1/2,-z+1; #2 x+1,y,z ;#3 x,y,z-1; #4 x+1,y,z-1;  
 #5 -x+1,-y+2,-z. For **2**: #1 -x,-y,-z+2; #2 x,y+1,z; #3 -x-1,-y+1,-z+2; #4 -x,-y,-z+1.

**Table S2:** Crystal Data and Structure Refinements for L<sup>1</sup> and L<sup>2</sup>.

|                                           | L <sup>1</sup>                                                 | L <sup>2</sup>                                 |
|-------------------------------------------|----------------------------------------------------------------|------------------------------------------------|
| Empirical formula                         | C <sub>54</sub> H <sub>54</sub> N <sub>12</sub> O <sub>5</sub> | C <sub>28</sub> H <sub>24</sub> N <sub>6</sub> |
| Fw                                        | 951.09                                                         | 444.53                                         |
| Crystal size [mm]                         | 0.28×0.20×0.12                                                 | 0.32×0.24×0.20                                 |
| Crystal system                            | Monoclinic                                                     | Triclinic                                      |
| Space group                               | <i>P2<sub>1</sub>/c</i>                                        | <i>P</i> $\bar{1}$                             |
| <i>a</i> [Å]                              | 15.487(5)                                                      | 6.6930(4)                                      |
| <i>b</i> [Å]                              | 18.635(5)                                                      | 9.4581(4)                                      |
| <i>c</i> [Å]                              | 9.233(5)                                                       | 9.7729(6)                                      |
| $\alpha$ [°]                              | 90                                                             | 71.507(4)                                      |
| $\beta$ [°]                               | 101.196(5)                                                     | 71.631(5)                                      |
| $\gamma$ [°]                              | 90                                                             | 87.487(4)                                      |
| Volume [Å <sup>3</sup> ]                  | 2613.9(18)                                                     | 555.73(5)                                      |
| <i>Z</i>                                  | 2                                                              | 1                                              |
| <i>D<sub>c</sub></i> (g/cm <sup>3</sup> ) | 1.208                                                          | 1.328                                          |
| GOF                                       | 0.871                                                          | 1.010                                          |
| Reflns collected/unique                   | 10633 / 4690                                                   | 9896 / 2912                                    |
| <i>R</i> <sub>int</sub>                   | 0.0273                                                         | 0.0268                                         |
| <i>R</i> <sub>1</sub> [I>2σ(I)]           | 0.0657                                                         | 0.0403                                         |

$wR_2$  (all data)

0.1878

0.1034

**Structure of  $L^1$  ligand.** As shown in Fig. S1, the asymmetric unit of  $L^1$  consists of one  $L^1$  molecule and two and a half lattice water molecules. The  $L^1$  ligand adopts a distorted *trans*-conformation. The three methylene groups arrange in a zigzag shape.

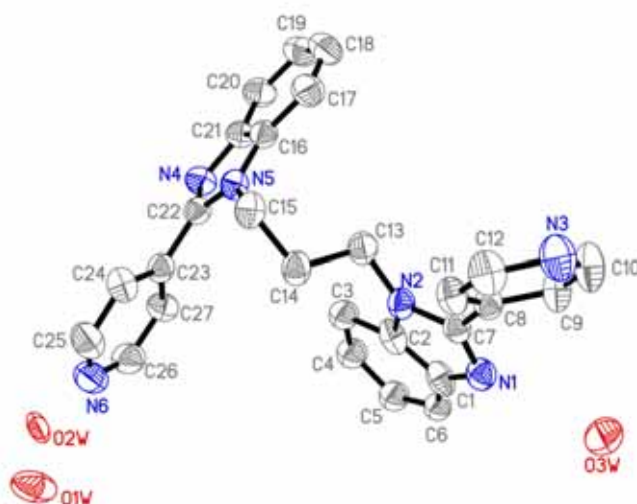

**Fig. S1** Crystal structure of  $L^1$  ligand (30% probability displacement ellipsoids).

**Structure of  $L^2$  ligand.** Single-crystal X-ray diffraction analysis reveals that there is half a  $L^2$  molecule lying about an inversion center (Fig. S2). The  $L^2$  ligand adopts a *trans*-conformation.

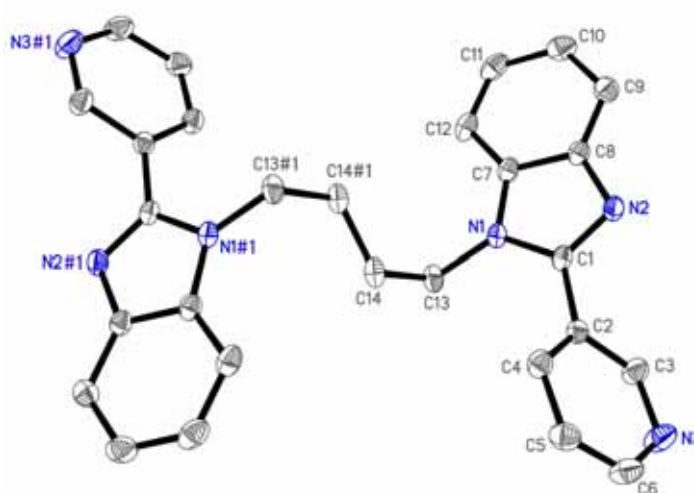

**Fig. S2.** Crystal structure of  $L^1$  ligand (30% probability displacement ellipsoids). Symmetry codes for the generated atoms: #1  $-x+2, -y, -z+2$ .

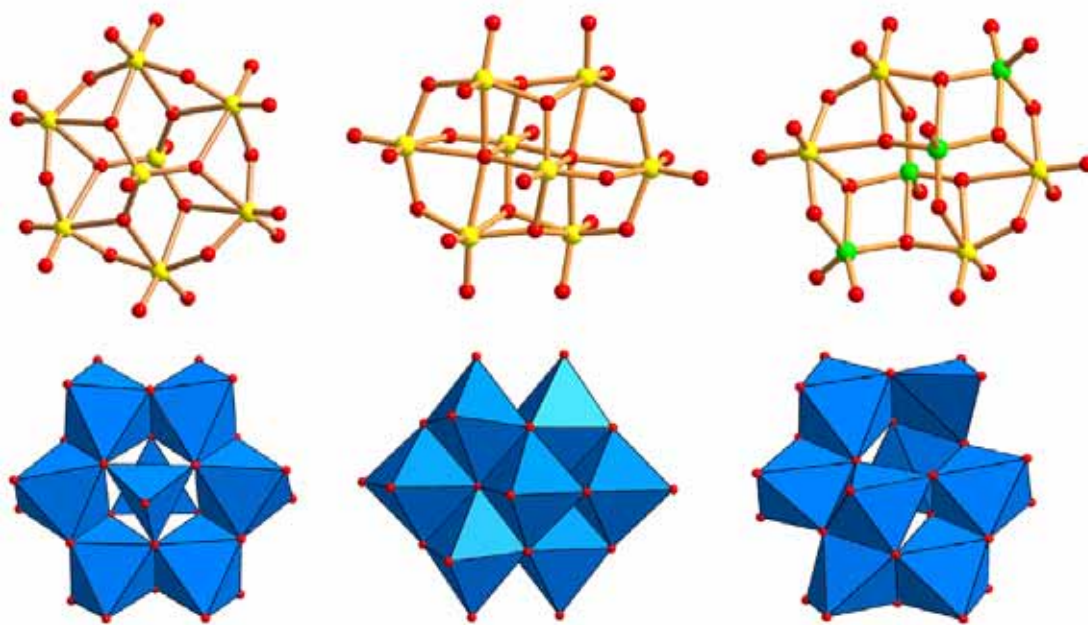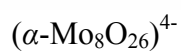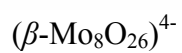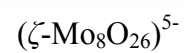

**Fig. S3** Ball-stick and polyhedral representations of the structures of  $\alpha$ -,  $\beta$ -, and  $\zeta$ -clusters of  $(\text{Mo}_8\text{O}_{26})^{4-}$ .

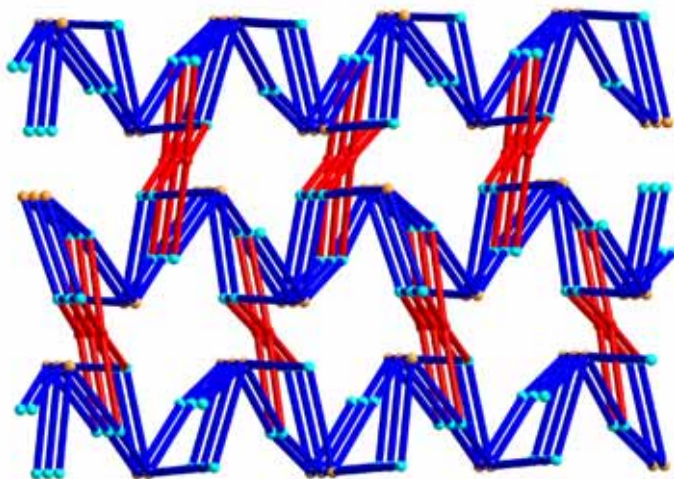

**Fig. S4** Schematic view of the (3,4)-connected framework with  $(4\cdot 8\cdot 12)(4\cdot 8^3\cdot 10^2)(4^2\cdot 8^2\cdot 10^2)$  topology in **1**.

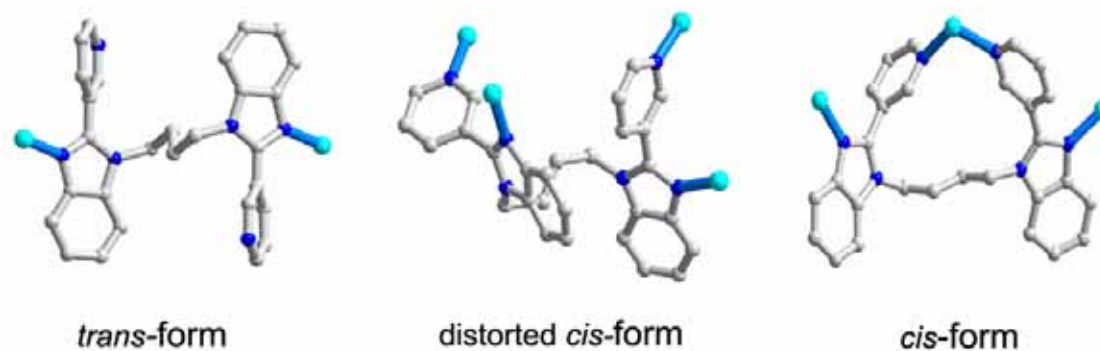

**Fig. S5** The configurations of L2 ligand in **2**.

### XPS Spectrum

The oxidation states of Mo and Cu in **2** are further confirmed by XPS measurements. In the XPS spectrum (Fig. S6), two overlapped peaks at 232.4 and 231.5 eV are attributed to Mo<sup>6+</sup> (3d<sub>5/2</sub>) and Mo<sup>5+</sup> (3d<sub>5/2</sub>), respectively.<sup>1</sup> Two peaks at 933.5 and 931.7 eV are ascribed to Cu<sup>2+</sup> (2p<sub>3/2</sub>) and Cu<sup>+</sup> (2p<sub>3/2</sub>), respectively. Two peaks at 954.3 and 951.3 eV are attributed to Cu<sup>2+</sup> (2p<sub>1/2</sub>) and Cu<sup>+</sup> (2p<sub>1/2</sub>), respectively.<sup>2</sup>

(1) T. A. Patterson, J. C. Carver, D. E. Leyden and D. M. Hercules, *J. Phys. Chem.*, 1976, **80**, 1700.

(2) (a) J.-Q. Sha, J. Peng, H.-S. Liu, J. Chen, B.-X. Dong, A.-X. Tian and Z.-M. Su, *Eur. J. Inorg. Chem.*, 2007, 1268; (b) J. Chen, J.-Q. Sha, J. Peng, Z.-Y. Shi, B.-X. Dong and A.-X. Tian, *J. Mol. Struct.*, 2007, **846**, 128.

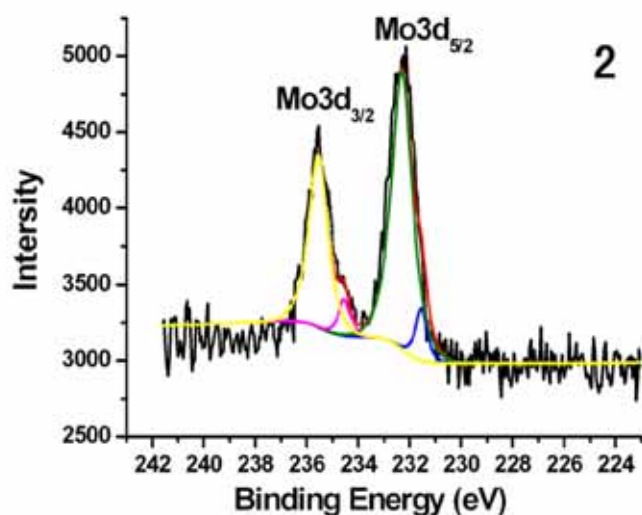

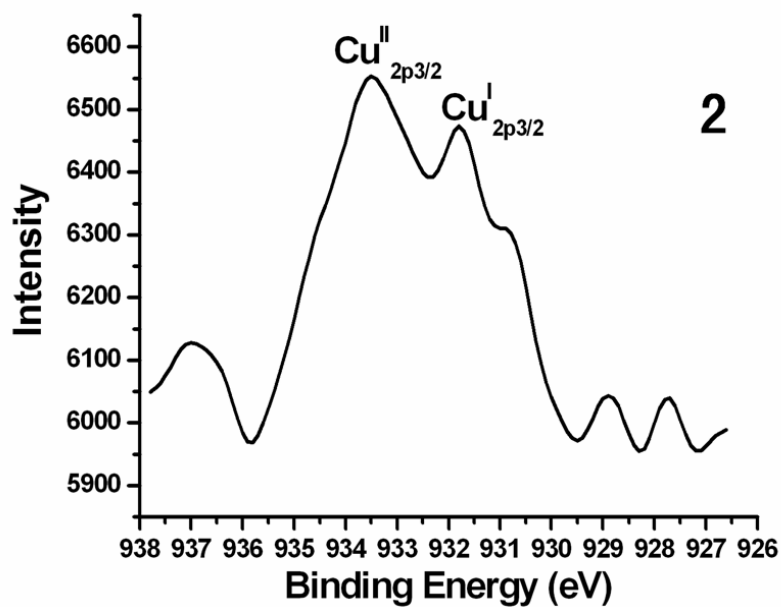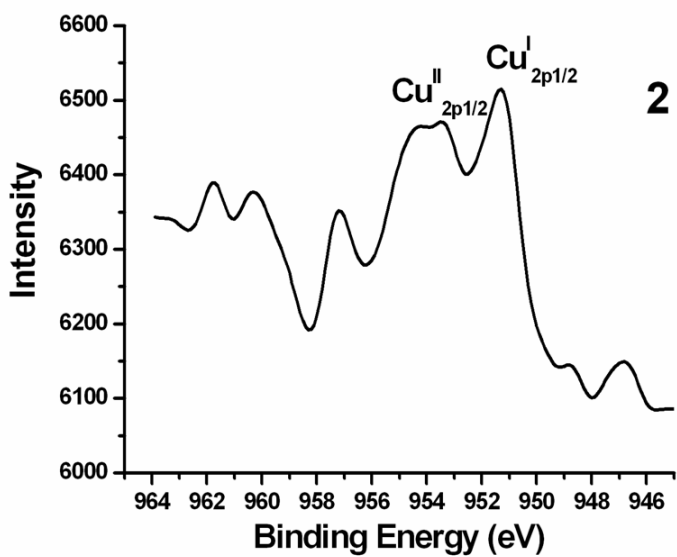

Fig. S6 XPS of compound 2.
